# Supplementary material
Source: publisher figshare collection journal article supplement (https://rs.figshare.com/ndownloader/files/13573967)
Supplement: Supplementary file 1 [file 13573967]

Table S4: Aligned sequences of 3 confirmed workers (‘sisters’ of bee K) and various tissues from bee K for the tRNAleu-COII mitochondrial DNA region, with the Q motif identified. There is no evidence that bee K was not a daughter of subject colony’s queen.

Q................................................................

71 81 91 101 111 121

Worker 1 TTTCCCCACT TAATTCATAT TAATTTAAAA ATAAATTAAT AACAATTTTT AATAAAATAA

Worker 2 TTTCCCCACT TAATTCATAT TAATTTAAAA ATAAATTAAT AACAATTTTT AATAAAATAA

Worker 3 TTTCCCCACT TAATTCATAT TAATTTAAAA ATAAATTAAT AACAATTTTT AATAAAATAA

Bee K (Ovary) TTTCCCCACT TAATTCATAT TAATTTAAAA ATAAATTAAT AACAATTTTT AATAAAATAA

Bee K (Sting) TTTCCCCACT TAATTCATAT TAATTTAAAA ATAAATTAAT AACAATTTTT AATAAAATAA

Bee K (Tongue) TTTCCCCACT TAATTCATAT TAATTTAAAA ATAAATTAAT AACAATTTTT AATAAAATAA

.................................................................

131 141 151 161 171 181

Worker 1 ATAATTAATT TTATTTTTAT ATTGAATTTT AAATTCAATC TTAAAGATTT AATCTTTTTA

Worker 2 ATAATTAATT TTATTTTTAT ATTGAATTTT AAATTCAATC TTAAAGATTT AATCTTTTTA

Worker 3 ATAATTAATT TTATTTTTAT ATTGAATTTT AAATTCAATC TTAAAGATTT AATCTTTTTA

Bee K (Ovary) ATAATTAATT TTATTTTTAT ATTGAATTTT AAATTCAATC TTAAAGATTT AATCTTTTTA

Bee K (Sting) ATAATTAATT TTATTTTTAT ATTGAATTTT AAATTCAATC TTAAAGATTT AATCTTTTTA

Bee K (Tongue) ATAATTAATT TTATTTTTAT ATTGAATTTT AAATTCAATC TTAAAGATTT AATCTTTTTA

.................................................................

191 201 211 221 231 241

Worker 1 TTAAAATTAA TAAATTAATA TAAAATAAAA CAAAATATAA CAGAATATAT TTATTAAAAT

Worker 2 TTAAAATTAA TAAATTAATA TAAAATAAAA CAAAATATAA CAGAATATAT TTATTAAAAT

Worker 3 TTAAAATTAA TAAATTAATA TAAAATAAAA CAAAATATAA CAGAATATAT TTATTAAAAT

Bee K (Ovary) TTAAAATTAA TAAATTAATA TAAAATAAAA CAAAATATAA CAGAATATAT TTATTAAAAT

Bee K (Sting) TTAAAATTAA TAAATTAATA TAAAATAAAA CAAAATATAA CAGAATATAT TTATTAAAAT

Bee K (Tongue) TTAAAATTAA TAAATTAATA TAAAATAAAA CAAAATATAA CAGAATATAT TTATTAAAAT

...........COII..................................................

251 261 271 281 291 301

Worker 1 TTAATTTATT AAAATTTCCA CATGATTTAT ATTTATATTT CAAGAATCAA ATTCATATTA

Worker 2 TTAATTTATT AAAATTTCCA CATGATTTAT ATTTATATTT CAAGAATCAA ATTCATATTA

Worker 3 TTAATTTATT AAAATTTCCA CATGATTTAT ATTTATATTT CAAGAATCAA ATTCATATTA

Bee K (Ovary) TTAATTTATT AAAATTTCCA CATGATTTAT ATTTATATTT CAAGAATCAA ATTCATATTA

Bee K (Sting) TTAATTTATT AAAATTTCCA CATGATTTAT ATTTATATTT CAAGAATCAA ATTCATATTA

Bee K (Tongue) TTAATTTATT AAAATTTCCA CATGATTTAT ATTTATATTT CAAGAATCAA ATTCATATTA

.................................................................

311 321 331 341 351 361

Worker 1 TGCTGATAAT TTAATTTCAT TTCATAATAT AGTTATAATA ATTATTATTA TAATTTCAAC

Worker 2 TGCTGATAAT TTAATTTCAT TTCATAATAT AGTTATAATA ATTATTATTA TAATTTCAAC

Worker 3 TGCTGATAAT TTAATTTCAT TTCATAATAT AGTTATAATA ATTATTATTA TAATTTCAAC

Bee K (Ovary) TGCTGATAAT TTAATTTCAT TTCATAATAT AGTTATAATA ATTATTATTA TAATTTCAAC

Bee K (Sting) TGCTGATAAT TTAATTTCAT TTCATAATAT AGTTATAATA ATTATTATTA TAATTTCAAC

Bee K (Tongue) TGCTGATAAT TTAATTTCAT TTCATAATAT AGTTATAATA ATTATTATTA TAATTTCAAC

.................................................................

371 381 391 401 411 421

Worker 1 ATTAACTGTA TATATTATTT TAGATTTATT TATAAACAAA TTCTCAAATT TATTTTTATT

Worker 2 ATTAACTGTA TATATTATTT TAGATTTATT TATAAACAAA TTCTCAAATT TATTTTTATT

Worker 3 ATTAACTGTA TATATTATTT TAGATTTATT TATAAACAAA TTCTCAAATT TATTTTTATT

Bee K (Ovary) ATTAACTGTA TATATTATTT TAGATTTATT TATAAACAAA TTCTCAAATT TATTTTTATT

Bee K (Sting) ATTAACTGTA TATATTATTT TAGATTTATT TATAAACAAA TTCTCAAATT TATTTTTATT

Bee K (Tongue) ATTAACTGTA TATATTATTT TAGATTTATT TATAAACAAA TTCTCAAATT TATTTTTATT

.........................................

431 451 461 471

Worker 1 AAAAAATCAT AATATTGAAA TTATTTGAAC AATTATTC

Worker 2 AAAAAATCAT AATATTGAAA TTATTTGAAC AATTATTC

Worker 3 AAAAAATCAT AATATTGAAA TTATTTGAAC AATTATTC

Bee K (Ovary) AAAAAATCAT AATATTGAAA TTATTTGAAC AATTATTC

Bee K (Sting) AAAAAATCAT AATATTGAAA TTATTTGAAC AATTATTC

Bee K (Tongue) AAAAAATCAT AATATTGAAA TTATTTGAAC AATTATTC
